# Supplementary material for: The First Scientific Research to Trace the Origins of Qin Sealing Clay
Source: Research Square preprint supplement (doi:10.21203/rs.3.rs-4789585/v1), 2024-08-22
Supplement: Supplementary file 1 [file 0a4ea667154e08ac7be23f4d.docx]

In this study, a large number of sealing clay in Qin dynasty across the country with inscriptions were unearthed in Xi 'an, China. This study uses petrographic microstructure analysis and X-ray fluorescence spectroscopy to detect the physical and chemical properties of various types of sealing clay for the first time. By focusing on the composition of their raw materials and the region used reflected in the inscriptions on the sealing clay, a comprehensive and systematic origin trace is carried out to prove that the raw materials of the clay are uniformly formulated. The composition and spatial connections of the different artefacts indicate that the exchange of materials and information between the local and central government is becoming frequent and close, and clay is processed centrally and sent to different area, confirming the strengthening of centralization of the central government.
